# Supplementary material
Source: HighWire-hosted journal article supplement (http://www.jrheum.org/highwire/filestream/32076/field_highwire_adjunct_files/0/160816DataSuppl.pdf)
Supplement: 160816DataSuppl.pdf [file 160816DataSuppl.pdf]

## ONLINE SUPPLEMENTARY DATA

### SUPPLEMENTARY MATERIAL. CODES USED TO IDENTIFY STUDY VARIABLES

| Condition | ICD-10/ICD-8                           | SNOMED code                                                                                                                                                                                                                                                              | Topography codes                                                                                                                                                                                                                                                                                                                                                                                                                                                                                                                                                                                                                    |
|-----------|----------------------------------------|--------------------------------------------------------------------------------------------------------------------------------------------------------------------------------------------------------------------------------------------------------------------------|-------------------------------------------------------------------------------------------------------------------------------------------------------------------------------------------------------------------------------------------------------------------------------------------------------------------------------------------------------------------------------------------------------------------------------------------------------------------------------------------------------------------------------------------------------------------------------------------------------------------------------------|
| L-TGCT    | --                                     | M92520 tenosynovial giant cell tumor, localized type (from 2011)                                                                                                                                                                                                         |                                                                                                                                                                                                                                                                                                                                                                                                                                                                                                                                                                                                                                     |
|           |                                        | M90400 benign synovioma (until 1 January 2013)                                                                                                                                                                                                                           | Restricted to the following topography: "Bone", "Vertebra", "Phalanx on a hand", "Femur", "Metatarsal bone", "Phalanx on a foot", "Joint", "Joint capsule", "Synovialis", "Intervertebral joint", "Discus intervertebralis", "Joint of upper extremity", "Shoulder joint", "Elbow joint", "Hand joint", "Metacarpal joint", "Interphalangeal joint on finger", "Joint of the lower extremity", "Hip joint", "Knee joint", "Meniscus", "Ankle joint", "Tarsal joint", "Metatarsal joint", "Interphalangeal joint of toe", "Tendon and tendon sheath", "Tendon", "Tendon sheath", "Finger", "Thumb", "Index finger", "Knee", "Ankle". |
| D- TGCT   | M122 pigmentous villonodular synovitis | M92521 tenosynovial giant cell tumor, diffuse type (from 1 January 2013)<br>M47830 pigmentous villonodular synovitis (until June 2011)<br>M92510 giant cell tumor, diffus type (until 30 June 2011)/tenosynovial giant cell tumor, diffuse type (until 31 December 2013) |                                                                                                                                                                                                                                                                                                                                                                                                                                                                                                                                                                                                                                     |

| Condition                                                           | ICD-8 codes                 | SNOMED codes                                                                                                                                                                                                                                                                                                                                                                                                                                                                                                                                                                                                                                                                                                                                                                                                                                                                                                                                                                                                                                                                                                                                                                                                                                                                                                                                                                                                                                                                                                                                                                                                                                                                                                                                                                                                                                                                                                                                                                                                                                                                                                                                                                                                                                                                                                                                                                                                                                                                                                                                                                                                                                                                                                                                                                                                                                                                                                                                                           |
|---------------------------------------------------------------------|-----------------------------|------------------------------------------------------------------------------------------------------------------------------------------------------------------------------------------------------------------------------------------------------------------------------------------------------------------------------------------------------------------------------------------------------------------------------------------------------------------------------------------------------------------------------------------------------------------------------------------------------------------------------------------------------------------------------------------------------------------------------------------------------------------------------------------------------------------------------------------------------------------------------------------------------------------------------------------------------------------------------------------------------------------------------------------------------------------------------------------------------------------------------------------------------------------------------------------------------------------------------------------------------------------------------------------------------------------------------------------------------------------------------------------------------------------------------------------------------------------------------------------------------------------------------------------------------------------------------------------------------------------------------------------------------------------------------------------------------------------------------------------------------------------------------------------------------------------------------------------------------------------------------------------------------------------------------------------------------------------------------------------------------------------------------------------------------------------------------------------------------------------------------------------------------------------------------------------------------------------------------------------------------------------------------------------------------------------------------------------------------------------------------------------------------------------------------------------------------------------------------------------------------------------------------------------------------------------------------------------------------------------------------------------------------------------------------------------------------------------------------------------------------------------------------------------------------------------------------------------------------------------------------------------------------------------------------------------------------------------------|
| Sarcoma or benign tumors before the index date (exclusion criteria) | 158, 170, 171, 213-215, 232 | M88001, M88003, M88004, M88006, M88007, M88009, M88043, M88044, M88047, M88049, M88053, M88054, M88056, M88057, M88059, M880A3, M880A4, M880A6, M880A7, M880A8, M880A9, M880B1, M880B3, M880B4, M880B6, M880B7, M880B9, M880C1, M880C3, M880C4, M880C6, M880C7, M880C8, M880C9, M88103, M88104, M88106, M88107, M88109, M88113, M88114, M88116, M88117, M88119, M88143, M88144, M88146, M88147, M88149, M88151, M88153, M88154, M88156, M88157, M88159, M88211, M88221, M88271, M88303, M88303, M88304, M88304, M88306, M88306, M88307, M88307, M88309, M88309, M88313, M88314, M88316, M88317, M88319, M88323, M88324, M88326, M88327, M88329, M88403, M88406, M88411, M88423, M88424, M88426, M88427, M88429, M88503, M88504, M88506, M88507, M88509, M88513, M88514, M88516, M88517, M88519, M88523, M88524, M88526, M88527, M88529, M88533, M88534, M88536, M88537, M88539, M88543, M88544, M88546, M88547, M88549, M88553, M88554, M88556, M88557, M88559, M88583, M88584, M88586, M88587, M88588, M88589, M88902, M88903, M88904, M88906, M88907, M88909, M88913, M88914, M88916, M88917, M88919, M88963, M88964, M88966, M88967, M88969, M89003, M89004, M89006, M89007, M89009, M89013, M89014, M89016, M89017, M89019, M89023, M89024, M89026, M89027, M89029, M89103, M89104, M89106, M89107, M89109, M89203, M89204, M89206, M89207, M89209, M89303, M89304, M89306, M89307, M89309, M89311, M89333, M89334, M89336, M89337, M89339, M89363, M89364, M89366, M89367, M89369, M90403, M90404, M90406, M90407, M90408, M90409, M90423, M90424, M90426, M90427, M90428, M90429, M90433, M90434, M90436, M90437, M90438, M90439, M90443, M90444, M90446, M90447, M90449, M91203, M91203, M91204, M91204, M91206, M91206, M91207, M91207, M91209, M91209, M91303, M91304, M91306, M91307, M91309, M91331, M91403, M91404, M91406, M91407, M91409, M91501, M91503, M91504, M91506, M91507, M91509, M91703, M91704, M91706, M91707, M91709, M91803, M91804, M91806, M91807, M91809, M91813, M91814, M91816, M91817, M91819, M91823, M91824, M91826, M91827, M91829, M91833, M91834, M91836, M91837, M91839, M91843, M91844, M91846, M91847, M91849, M91853, M91854, M91856, M91857, M91859, M91903, M91904, M91906, M91907, M91909, M92203, M92204, M92206, M92207, M92209, M92213, M92214, M92216, M92217, M92219, M92223, M92224, M92226, M92227, M92246, M92247, M92303, M92304, M92306, M92307, M92309, M92313, M92313, M92314, M92314, M92316, M92316, M92317, M92317, M92319, M92319, M92403, M92404, M92406, M92407, M92409, M92501, M92501, M92503, M92504, M92506, M92507, M92509, M92511, M92513, M92514, M92516, M92517, M92519, M92603, M92604, M92606, M92607, M92609, M92613, M92614, M92616, M92617, M92619, M95403, M95404, M95404, M95406, M95406, M95407, M95407, M95409, M95409, M95603, M95603, M95604, M95604, M95606, M95606, M95607, M95607, M95609, M95609, M95803, M95804, M95806, M95807, M95809, M95813, M95814, M95816, M95817, M95819 |

### Baseline characteristics

| Group                                | Characteristic                                       | Codes                                                                                                                                                                                                                                          |
|--------------------------------------|------------------------------------------------------|------------------------------------------------------------------------------------------------------------------------------------------------------------------------------------------------------------------------------------------------|
| Treatments and diagnostic procedures | Any operation or surgery of muscular-skeletal system | NOMESCO: KN (all subcodes) last measurement 16 days before the index date                                                                                                                                                                      |
|                                      | MRI/CT scan                                          | U-codes: UXC (all subcodes, CT scan), UXM (all subcodes, MRI scans)                                                                                                                                                                            |
| Musculoskeletal injuries             | Any injury to spine or limbs                         | ICD10: S19-S99, T08-T13                                                                                                                                                                                                                        |
|                                      | Any fracture                                         | ICD10: S12, S22, S32, S42, S52, S62, S72, S82, S92, T02, T08, T10, T12<br><br>NOMESCO: KNAJ, KNBJ, KNCJ, KNDJ, KNEJ, KNFJ, KNGJ, KNHJ                                                                                                          |
|                                      | Fracture of sternum, spine, or pelvis                | ICD10: S12 Fracture of neck, S22 Fracture of rib(s), sternum and thoracic spine, S32 Fracture of lumbar spine and pelvis, T08 Fracture of spine, level unspecified<br><br>NOMESCO: KNAJ, KNEJ, operations to treat fracture of spine or pelvis |
|                                      | Fracture of upper limb                               | ICD10: S42 Fracture of shoulder and upper arm, S52 Fracture of forearm, S62 Fracture at wrist and hand level, T10 Fracture of upper limb, level unspecified<br><br>NOMESCO: KNBJ, KNCJ, KNDJ operations to treat fracture of upper limb        |
|                                      | Fracture of lower limb                               | ICD10: S72 Fracture of femur, S82 Fracture of lower leg, including ankle, S92 Fracture of foot, except ankle, T12 Fracture of lower limb, level unspecified<br><br>NOMESCO: KNFJ, KNGJ, KNHJ, operations to treat fractures of lower limb      |
| Chronic diseases                     | Arthropathies                                        | ICD10: M00-M25                                                                                                                                                                                                                                 |
|                                      | Osteoarthritis                                       | ICD10: M15-M19                                                                                                                                                                                                                                 |
|                                      | Chronic renal impairment                             | ICD10: N18                                                                                                                                                                                                                                     |
|                                      | Chronic lung disease                                 | ICD10: J43-J47                                                                                                                                                                                                                                 |
|                                      | Cardiovascular disease                               | ICD10: I10-I25                                                                                                                                                                                                                                 |
| Prescription medications (2004-)     | Analgesics                                           | ATC: N02                                                                                                                                                                                                                                       |
|                                      | Corticosteroids for systemic use                     | ATC: H02                                                                                                                                                                                                                                       |
|                                      | Antibiotics                                          | ATC: J01                                                                                                                                                                                                                                       |
|                                      | Antiinflammatory and antirheumatic agents            | ATC: M01                                                                                                                                                                                                                                       |
|                                      | Muscle relaxants                                     | ATC: M03                                                                                                                                                                                                                                       |
| Chemotherapy                         |                                                      | In-hospital treatment codes: BWHA (cytostatic treatment)                                                                                                                                                                                       |

### Operations on musculoskeletal system and their skeletal regions

| Operation category                                                           | Operation type                                                    | NOMESCO code (all subcodes if not otherwise specified, *=A-H, location) |
|------------------------------------------------------------------------------|-------------------------------------------------------------------|-------------------------------------------------------------------------|
| Exploratory procedures including biopsy                                      | Exploratory procedures including biopsy                           | KN*A<br>(KNAA, KNBA, KNCA, KNDA, KNEA, KNFA, KNGA, KNHA)                |
| Operations assumed to be for TGCT treatment                                  | Operations on synovia and joint surfaces                          | KN*F<br>(KNAF, KNBF, KNCF, KNDF, KNEF, KNFF, KNGF, KNHF)                |
|                                                                              | Operations on muscles and tendons (except in pelvis or hip/thigh) | KN*L except KNEL or KNFL<br>(KNAL, KNBL, KNCL, KNDL, KNGL, KNHL)        |
|                                                                              | Operations of fascia, ganglia, synovial sheaths and bursae        | KN*M                                                                    |
|                                                                              | Operations for tumors of musculoskeletal system                   | KN*R                                                                    |
| All other operations on musculoskeletal system                               | KNEL, KNFL                                                        | Operations on muscles and tendons in pelvis or hip/thigh                |
|                                                                              | KN*B                                                              | Primary prosthetic joint replacement                                    |
|                                                                              | KN*C                                                              | Secondary prosthetic joint replacement                                  |
|                                                                              | KN*E                                                              | Operations on capsules and ligaments                                    |
|                                                                              | KN*G                                                              | Excision, reconstruction and fusion of joints                           |
|                                                                              | KN*H                                                              | Miscellaneous operations on joints                                      |
|                                                                              | KN*J                                                              | Fracture surgery                                                        |
|                                                                              | KN*K                                                              | Operations on bones                                                     |
|                                                                              | KN*N                                                              | Transplantations                                                        |
|                                                                              | KN*P                                                              | Replantation and autotransplantation                                    |
|                                                                              | KN*Q                                                              | Amputations                                                             |
|                                                                              | KN*S                                                              | Operations for infections of tendons, joints and bone                   |
|                                                                              | KN*T                                                              | Miscellaneous operations                                                |
|                                                                              | KN*U                                                              | Removal of implants and internal fixation devices                       |
|                                                                              | KN*W                                                              | Reoperations                                                            |
| <b>Region of the operation (3<sup>rd</sup> position of the KNxxxx codes)</b> |                                                                   |                                                                         |
| 'A' = 'Spine and neck'                                                       |                                                                   |                                                                         |
| 'B' = 'Shoulder and upper arm'                                               |                                                                   |                                                                         |
| 'C' = 'Elbow and forearm'                                                    |                                                                   |                                                                         |
| 'D' = 'Wrist and hand'                                                       |                                                                   |                                                                         |
| 'E' = 'Pelvis'                                                               |                                                                   |                                                                         |
| 'F' = 'Hip joint and thigh'                                                  |                                                                   |                                                                         |
| 'G' = 'Knee joint and lower leg'                                             |                                                                   |                                                                         |
| 'H' = 'Ankle and foot'                                                       |                                                                   |                                                                         |

**Supplementary Table 1. Distribution of topography codes among patients with TGCT, Denmark, 1997-2012.**

| Localization                                          | L-TGCT       | D-TGCT      |
|-------------------------------------------------------|--------------|-------------|
| Fingers                                               | 1,101 (53%)  | 33 (8.9%)   |
| Knee/knee joint                                       | 155 (7.4%)   | 83 (22%)    |
| Tendon, synovialis, tendon sheath, unspecified joints | 625 (30%)    | 188 (51%)   |
| Upper limb                                            | 105 (5.0%)   | 20 (5.4%)   |
| Lower limb                                            | 47 (2.2%)    | 33 (8.9%)   |
| Other, unspecified, unknown                           | 54 (2.6%)    | 217 (37.8%) |
| Total                                                 | 2,087 (100%) | 574 (100%)  |
